# Supplementary material
Source: ML conference proceedings conference paper supplement (https://openreview.net/forum?id=zaEiQ2dgLv)

# QSAR Dataset

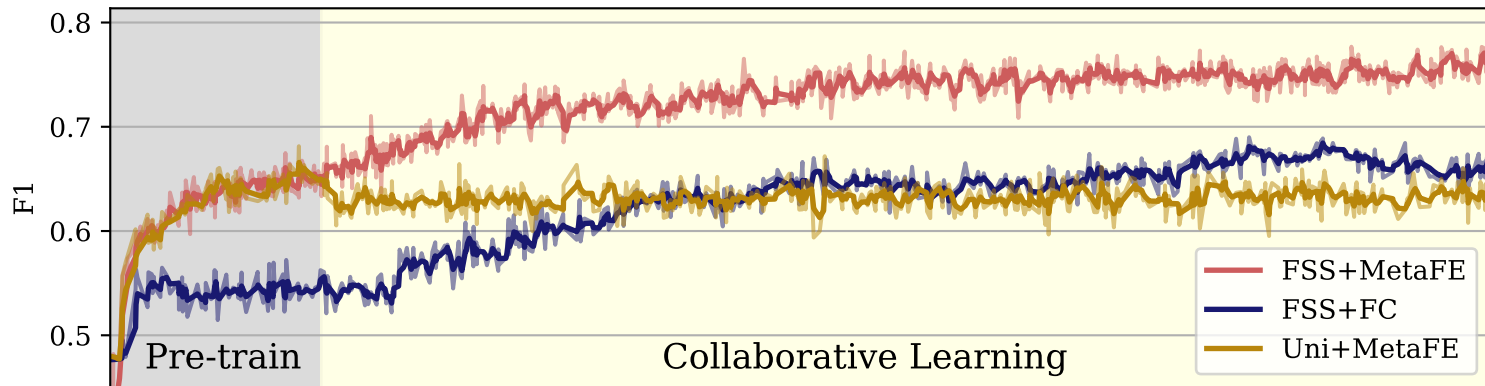

# Gisette Dataset

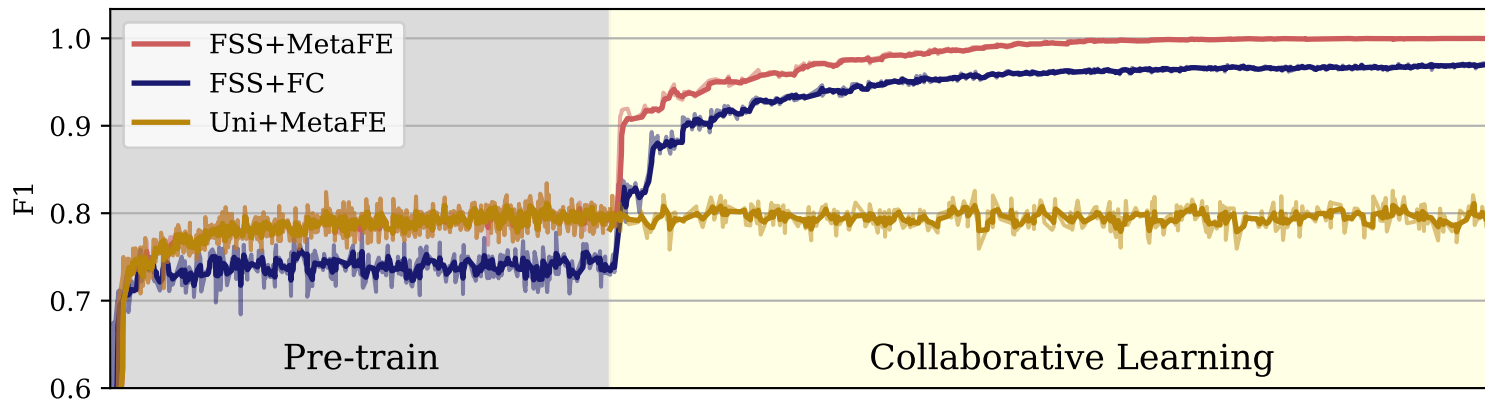

Supplement: supplementary_material [file attachment]

# Shopping Dataset

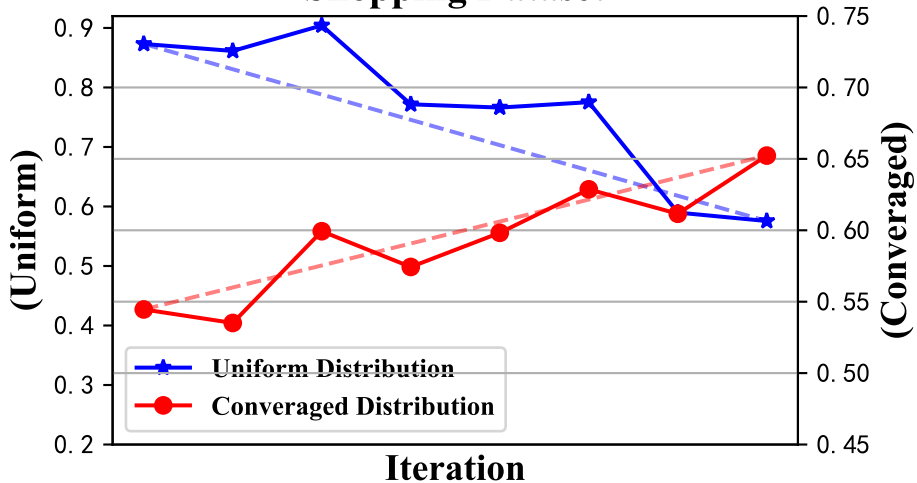

Supplement: supplementary_material [file attachment]

# Gisette Dataset

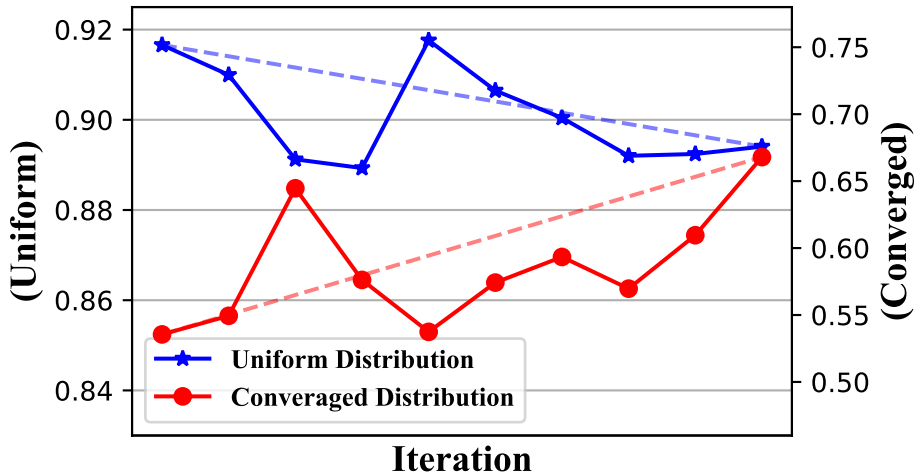

Supplement: supplementary_material [file attachment]

# Gisette Dataset

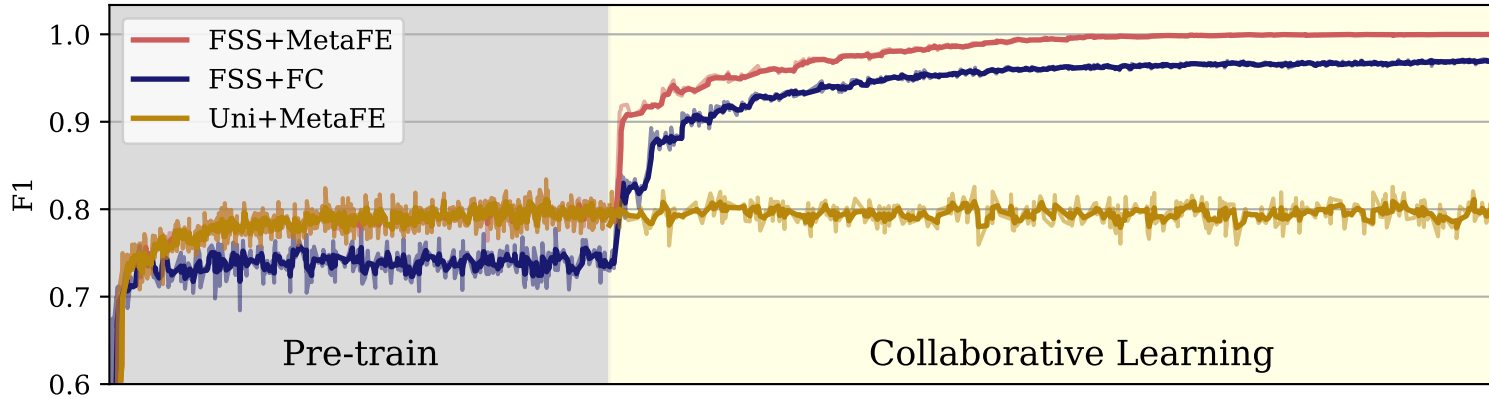

Supplement: supplementary_material [file attachment]
